# Supplementary material
Source: HighWire-hosted journal article supplement (http://jpet.aspetjournals.org/highwire/filestream/142370/field_highwire_adjunct_files/0/248682SupplFigure.pdf)
Supplement: 248682SupplFigure.pdf [file 248682SupplFigure.pdf]

Supplementary Figure 1

Title: Activation of Large Conductance, Calcium-Activated K Channels by Nitric Oxide Mediates Apelin-Induced Relaxation of Isolated Rat Coronary Arteries

Authors: Amreen Mughal, Chengwen Sun, and Stephen T. O'Rourke

Journal: Journal of Pharmacology and Experimental Therapeutics

Figure legend:

**Supplementary Figure 1. Intracellular cGMP formation in response to apelin in the presence of 5-HT in coronary arteries.** Bar graphs demonstrating the lack of an effect of apelin ( $10^{-7}$  and  $10^{-6}$  M, 5 min), in the presence of 5-HT ( $10^{-7}$  M, 5 min), on intracellular cGMP levels in endothelium-intact coronary arterial segments. Values are represented as means  $\pm$  S.E.M. (n = 4).

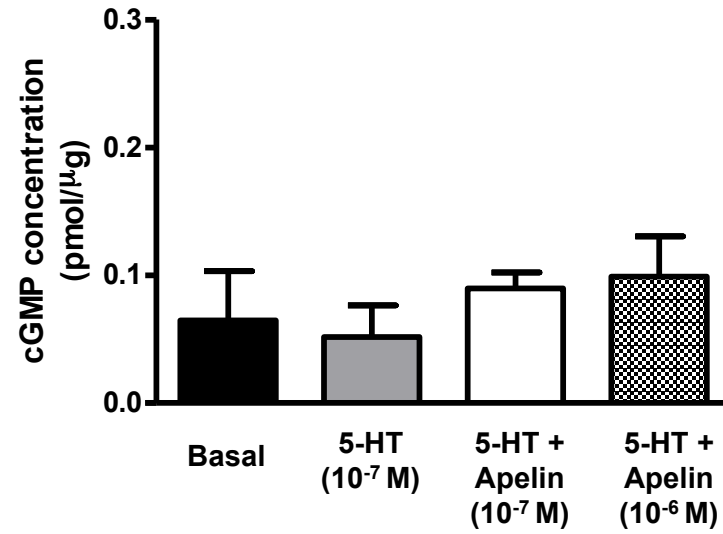

**Supplementary Figure 1**
